# Supplementary material for: Evaluation of DNA extraction methods and direct PCR in metabarcoding of mock and marine bacterial communities
Source: Front Microbiol. 2023 Apr 17;14:1151907. doi: 10.3389/fmicb.2023.1151907 (PMC10149847; doi:10.3389/fmicb.2023.1151907)
Supplement: Supplementary file 3 [file Data_Sheet_2.XLSX]

## Sheet: Mock_filtered_family_rel_revise
Method	B1	B1	B1	B1	B2	B2	B2	B2	B2	B2	B3	B3	B3	B3	B3	B3	K1	K1	K1	K2	K2	K2	P	P	P						Mock taxa are in blue
Sample	11-16S	23-16S	8-16S	9-16S	12-16S	13-16S	14-16S	15-16S	24-16S	25-16S	16-16S	17-16S	18-16S	19-16S	26-16S	27-16S	4-16S	5-16S	6-16S	1-16S	2-16S	3-16S	dPCR4	dPCR5	dPCR6		Kingdom	Phylum	Class	Order	Family
ASV1	0.330986	0.192126	0.467769	0.441308	0.254072	0.512267	0.312432	0.257886	0.300192	0.616413	0.318553	0.297832	0.231076	0.329941	0.255723	0.351394	0.56743	0.233887	0.311446	0.263988	0.331558	0.432753	0.163651	0.277928	0.230332		Bacteria	Actinobacteriota	Actinobacteria	Micrococcales	Microbacteriaceae
ASV2	0.0580986	0.0204724	0.0122723	0.00870383	0.0471112	0.0273064	0.0528679	0.0211835	0.0610367	0.0311114	0.0432968	0.268497	0.0608342	0.0306496	0.0165611	0.0319227	0.0129472	0.164057	0.122858	0.284342	0.181929	0.0855334	0	0	0		Bacteria	Proteobacteria	Gammaproteobacteria	Burkholderiales	Burkholderiaceae
ASV3	0.144366	0.143307	0.137192	0.159962	0.134068	0.0798725	0.123074	0.158646	0.127746	0.0544793	0.119457	0.0657092	0.123266	0.135407	0.158792	0.116683	0.208352	0.237233	0.187994	0.1201	0.133947	0.14741	0.269608	0.214771	0.198478		Bacteria	Proteobacteria	Alphaproteobacteria	Sphingomonadales	Sphingomonadaceae
ASV4	0.144366	0.148819	0.102442	0.139497	0.17614	0.112697	0.145813	0.178909	0.133379	0.0615889	0.141541	0.0824285	0.19548	0.128431	0.179412	0.131788	0.046026	0.0911929	0.0630219	0.0464876	0.0394786	0.0308835	0.309065	0.198807	0.257113		Bacteria	Cyanobacteria	Cyanobacteriia	Synechococcales	Cyanobiaceae
ASV5	0.155516	0.290551	0.0788012	0.0832745	0.127153	0.0825928	0.123302	0.115588	0.123236	0.118218	0.10746	0.106702	0.12745	0.119625	0.113817	0.123777	0.0152672	0.0510443	0.0716255	0.0610761	0.0549741	0.0484842	0.0343603	0.0501153	0.0971054		Bacteria	Firmicutes	Bacilli	Bacillales	Bacillaceae
ASV6	0.0146714	0.0307087	0.0326831	0.0268172	0.0540255	0.0357522	0.0365528	0.0402947	0.0395686	0.0158175	0.0429491	0.00667088	0.0472543	0.0522644	0.0428641	0.0399951	0.0354737	0.0437202	0.0454054	0.0321086	0.0415031	0.0400498	0.0534849	0.0606699	0.0431717		Bacteria	Proteobacteria	Gammaproteobacteria	Enterobacterales	Vibrionaceae
ASV7	0.0393192	0.0519685	0.0576153	0.046342	0.0822688	0.0599497	0.0771986	0.10845	0.087957	0.0371187	0.0792906	0.0161195	0.0813218	0.0884035	0.0815067	0.0821306	0.019084	0.0353528	0.0707778	0.0724816	0.0903569	0.0828988	0.0305247	0.0551743	0.0758288		Bacteria	Proteobacteria	Gammaproteobacteria	Enterobacterales	Pseudoalteromonadaceae
ASV8	0.068662	0.0440945	0.0313913	0.0378734	0.0270714	0.0212441	0.0318913	0.0361501	0.029907	0.0179118	0.0293862	0.0351326	0.0397177	0.0331656	0.0433512	0.0281311	0.0466996	0.0528264	0.0362853	0.0387816	0.030337	0.0399766	0.0844713	0.0333754	0.032286		Bacteria	Proteobacteria	Alphaproteobacteria	Rhodobacterales	Rhodobacteraceae
ASV11	0.00880282	0.011811	0.0183439	0.00870383	0.0250791	0.0133682	0.0191575	0.010822	0.0174591	0.00834964	0.0128673	0.00188342	0.0180249	0.00972095	0.0269524	0.018591	0.0145188	0.0226678	0.0171001	0.0138625	0.0187504	0.0192656	0.0100151	0.0309424	0.0215858		Bacteria	Proteobacteria	Gammaproteobacteria	Pseudomonadales	Marinobacteraceae
ASV14	0.00586854	0.0165354	0.00904276	0.00964479	0.0164069	0.011762	0.017111	0.0119733	0.0182008	0.00710959	0.0172144	0.00438763	0.0149771	0.0178408	0.0202955	0.0168787	0.00239485	0.00629541	0.0142647	0.0152167	0.0142808	0.0138317	0.0029477	0.0103711	0.00804057		Bacteria	Bacteroidota	Bacteroidia	Flavobacteriales	Flavobacteriaceae
ASV15	0	0	0.00374629	0.00141143	0.00527364	0.00227985	0.00608266	0.00345383	0.00499118	0.00217697	0.00869414	0.0557239	0.00676809	0.00228728	0.000974184	0.0108855	0.000299356	0.00225302	0.000925646	0.00216384	0.00225814	0.00100628	0.000443931	0.000968137	6.18506e-05		Bacteria	Actinobacteriota	Actinobacteria	Propionibacteriales	Propionibacteriaceae
ASV18	0	0	0.000387547	0	0.000820345	0.000725407	0.00119379	0	0.00194436	0.0012676	0.000869414	0.0107323	0.00158941	0	0.000974184	0.000733855	0	0.00249933	0.00221181	0.00492797	0.00288108	0.00137219	0	0	0		Bacteria	Proteobacteria	Gammaproteobacteria	Pseudomonadales	Moraxellaceae
ASV19	0.00997653	0.0141732	0.0102054	0.0084686	0.0173444	0.0146118	0.0147234	0.0170389	0.0150337	0.00713715	0.016345	0.0026936	0.0164617	0.0267612	0.0141257	0.0121698	0.00299356	0.00677355	0.0156678	0.0145885	0.0184545	0.0166676	0.00836367	0.0141392	0.00884463		Bacteria	Proteobacteria	Gammaproteobacteria	Enterobacterales	Alteromonadaceae
ASV21	0.0105634	0.011811	0.0178272	0.0117619	0.0168757	0.00917122	0.0142687	0.0177297	0.0136706	0.00650335	0.0116501	0.00748106	0.0121738	0.00834858	0.0139633	0.012659	0.0133214	0.0165173	0.0162719	0.0117545	0.0178939	0.0181313	0.0119329	0.0255069	0.0126794		Bacteria	Proteobacteria	Alphaproteobacteria	Caulobacterales	Hyphomonadaceae
ASV26	0.00293427	0.0125984	0.00413383	0.00470478	0.00539084	0.00398974	0.0062532	0.00506562	0.00483082	0.00347213	0.00573813	0.000715488	0.00395606	0.00560384	0.00746874	0.00495352	0.00336776	0.00626644	0.00546618	0.004914	0.0049212	0.0067329	0.00237947	0.00618216	0.00383474		Bacteria	Proteobacteria	Alphaproteobacteria	Parvibaculales	Parvibaculaceae
ASV30	0.00586854	0.00551181	0.00284201	0.00399906	0.00410172	0.00292754	0.00284236	0.00529588	0.00360808	0.00223208	0.00295601	0.00038931	0.00334474	0.00343092	0.00389674	0.00256849	0.00471486	0.00969305	0.00594362	0.00277809	0.00334828	0.00347622	0.00136731	0.00419526	0.00278328		Bacteria	Planctomycetota	Phycisphaerae	Phycisphaerales	Phycisphaeraceae
ASV31	0	0	0.00607157	0.00658669	0.00316419	0.00414519	0.0062532	0.00552613	0.00597338	0.00319656	0.00539037	0.00762837	0.00556293	0.0032022	0.00714402	0.005932	0.00426583	0.0100263	0.00519336	0.00421599	0.00496792	0.00483012	0.0114534	0.00562532	0.00711282		Bacteria	Proteobacteria	Alphaproteobacteria	Rhizobiales	Rhizobiaceae
ASV36	0	0	0.000904276	0	0.000820345	0.000414519	0.00147803	0.00138153	0.00164368	0.000330679	0.00121718	0.00926978	0.00203479	0.000800549	0	0.00189579	0	0.00070271	0.000341028	0	0.000218028	0	0	0.000759323	0		Bacteria	Firmicutes	Bacilli	Staphylococcales	Staphylococcaceae
ASV37	0	0	0.00193773	0	0	0.00134719	0.00170542	0.00138153	0.00142319	0.00154317	0.00278212	0.00143098	0.00132742	0.00148673	0.00146128	0.00183464	0.00127226	0.00207915	0.00206565	0.00106098	0.00189996	0.00124412	0.00225517	0.00307842	0		Bacteria	Proteobacteria	Alphaproteobacteria	Rhizobiales	Stappiaceae
ASV41	0	0	0	0	0	0	0.000341084	0	0	0	0	0.00268308	0.00288189	0	0	0	0	0	0.000457951	0.000153563	0.000155734	0.000128071	0	0.00375865	0		Bacteria	Firmicutes	Bacilli	Lactobacillales	Streptococcaceae
ASV42	0	0	0	0	0	0	0	0	0.00322723	8.26697e-05	0	0.00335648	0.000532714	0.000686185	0	0.000672701	0	5.79555e-05	0.000750261	0.000879495	0.00135489	0.0008965	0	0	0		Bacteria	Proteobacteria	Gammaproteobacteria	Xanthomonadales	Xanthomonadaceae
ASV45	0	0	0.00142101	0	0.000937537	0.000673593	0.000909556	0	0.00128287	0.000358235	0	0.000284091	0.000733573	0.000800549	0.00129891	0.000428082	0.000374195	0.00112289	0.0010036	0.00103306	0.000934405	0.00137219	0.000639261	0.00114531	0.000432954		Bacteria	Proteobacteria	Alphaproteobacteria	Thalassobaculales	Thalassobaculaceae
ASV46	0	0.00314961	0.000645911	0	0.00058596	0.000829037	0.0010801	0.00115128	0.00094211	0.000413348	0	0	0.000689908	0	0	0.000672701	0.000449035	0.000615777	0.00101334	0.000991177	0.00133931	0.00122583	0.00051496	0.00146802	0		Bacteria	Bacteroidota	Rhodothermia	Balneolales	Balneolaceae
ASV59	0	0	0	0	0.000234384	0	0	0	0	0.000137783	0	0.000441919	0.000104796	0	0	0	0	0.000318755	0.000292309	0.000279205	0.000327042	0.000256143	0	0	0		Bacteria	Actinobacteriota	Actinobacteria	Pseudonocardiales	Pseudonocardiaceae
ASV62	0	0	0.000775094	0	0	0.000647685	0.000511625	0.0020723	0.000681527	0.000661357	0.000347766	0.000189394	0.000611311	0.00114364	0.00113655	0.000550391	0.000374195	0.000680977	0.000448208	0.000251284	0.000669657	0.000841612	0	0.000385989	0		Bacteria	Proteobacteria	Alphaproteobacteria	Rhodospirillales	Terasakiellaceae
ASV63	0	0	0.000645911	0.000940955	0.000820345	0.000259074	0.00102325	0	0.000581302	0.000248009	0.0010433	0.000505051	0.000716107	0	0	0.000305773	0.000374195	0.000753421	0.000760004	0.000279205	0.000716377	0.000384214	0	0.000230961	0.000185552		Bacteria	Proteobacteria	Gammaproteobacteria	Nitrosococcales	Methylophagaceae
ASV65	0	0	0.000516729	0	0	0.000129537	0.000113695	0	0.000120269	5.51131e-05	0	0.00356692	0.000366787	0	0	0.000244618	0	0.000166622	0.000194873	6.98012e-05	0	0.000128071	0	0	0		Bacteria	Proteobacteria	Gammaproteobacteria	Burkholderiales	Neisseriaceae
ASV70	0	0	0	0	0	0.000310889	0.000966403	0	0	0	0	0.00252525	0.000253257	0	0	0	0	0	0	0	0	0	0	0	0		Bacteria	Proteobacteria	Gammaproteobacteria	Burkholderiales	Comamonadaceae
ASV73	0	0	0	0	0	0.000181352	0.000682167	0	0	0	0.0306034	0.000631313	0	0	0	0	0	0	0	0	0	0	0	0	0		Bacteria	Proteobacteria	Gammaproteobacteria	Enterobacterales	Enterobacteriaceae
ASV74	0	0	0	0	0	0	0	0	0	0	0	0.000704966	0	0	0	0	0	0.000108667	0	0	0.000327042	0	0	0.000215142	0		Bacteria	Proteobacteria	Alphaproteobacteria	Reyranellales	Reyranellaceae
ASV76	0	0	0	0	0	0.000207259	0	0	0.000100225	0	0	0.000873316	0	0	0	0	0	0.000470888	0	0	0	0	0.00239723	0.000148701	0		Bacteria	Bacteroidota	Bacteroidia	Flavobacteriales	Weeksellaceae
ASV84	0	0.0023622	0	0	0	0	0	0	0.000420943	0.00140538	0	0	0	0	0.00730638	0.00152886	0	0.000108667	0	0	0	0.000219551	0.000124301	0	0		Bacteria	Proteobacteria	Alphaproteobacteria	SAR11 clade	Clade I
ASV88	0	0	0	0	0	0	0.000170542	0	0.000280629	0	0.000347766	0.00138889	0.00017466	0	0	0	0	0.000137644	5.84619e-05	0.000111682	0	0	0	0	0		Bacteria	Actinobacteriota	Actinobacteria	Corynebacteriales	Corynebacteriaceae
ASV95	0	0	0.000387547	0	0.000234384	0.000336796	0	0	0	0	0	0.000704966	0.000227058	0	0	0.000122309	0	0.000318755	0.000155898	0.000907416	0	0	0	3.79662e-05	0.000123701		Bacteria	Proteobacteria	Gammaproteobacteria	Salinisphaerales	Salinisphaeraceae
ASV142	0	0	0	0	0	0	0	0	0.000180404	0	0	0.000326178	0	0	0	0	0	0	0	0.000195443	0.000218028	0	0	0	0		Bacteria	Firmicutes	Bacilli	Bacillales	Marinococcaceae
ASV149	0	0	0	0	0	0	0	0	0.000380853	0.000385792	0	0.00038931	8.73301e-05	0	0	0	0	0	0	0	0	0	0	0	0		Bacteria	Proteobacteria	Alphaproteobacteria	Caulobacterales	Caulobacteraceae
ASV251	0	0	0	0	0	0	0	0	0	0.000275566	0	0	0	0	0.000974184	0.000550391	0	5.0711e-05	0	0	0	0	0	0	0		Bacteria	Proteobacteria	Alphaproteobacteria	SAR11 clade	Clade II
